# Supplementary material
Source: publisher figshare collection journal article supplement (https://future-science-group.figshare.com/ndownloader/files/31257880)
Supplement: Supplementary file 1 [file 31257880]

**Search Strategy**

*Date of search: January 8th, 2020*

| **N** | **Database**: search strategy | **Records retrieved** |
| --- | --- | --- |
| 1 | **Medline:** Impella 5.0[Title/Abstract] AND (("2008/01/01"[PDat] : "2020/01/08"[PDat])): | 65 |
| 2 | **Embase:** 'impella 5.0':ab,ti AND [2008-2020]/py: | 172 |
| 3 | **Cochrane Library:** Impella 5.0: ti,ab,kw (with Cochrane Library publication date from Jan 2008 to Jan 2020) | 7 |
| 4 | **Centre for Reviews and Dissemination (CRD):** ((Impella)) and (Project record:ZDT OR Full publication record:ZDT) IN HTA WHERE LPD FROM 01/01/2008 TO 08/01/2020 | 13 |
| 5 | **EU Clinical Trials Register:** Impella | 1 |
| 6 | **PROSPERO:** Impella | 8 |
| 7 | **ECRI Institute:** Impella | 2 |
| 8 | **International Clinical Trials Registry platform (ICTRP):** Impella | 24 |
| 9 | **ClinicalTrials.gov:** Impella | 33 |
